# Supplementary material for: Subnanosecond Charge Recombination Dynamics in P3HT/PC61BM Films
Source: Molecules. 2012 Nov 23;17(12):13923–36. doi: 10.3390/molecules171213923 (PMC6268940; doi:10.3390/molecules171213923)
Supplement: Supplementary file 1 [file molecules-17-13923-s001.pdf]

# Supporting Information

## S1. Comparison of the Performance between the SVA and the CS<sub>2</sub>-cast Treated Devices

The polymer solar cells were manufactured on patterned ITO-coated glass substrates. The ITO surface was modified by spin-coating PEDOT:PSS (Baytron P VP A1 4083) with a thickness of ~40 nm, followed by baking in air at 150 °C for 15 min. Photoactive layers were obtained by spin-coating the blend solution (1,000 rpm, 30 s). The SVA treatment was performed by keeping the substrate coated from the *o*-dichlorobenzene (*o*-DCB) solution of P3HT-PC<sub>61</sub>BM mixture in Petri dishes under the *o*-DCB atmosphere for 1 h. The films coated from the CS<sub>2</sub> solutions were dried in open atmosphere to obtain the un-annealed photoactive layer (referred to as the CS<sub>2</sub>-casted film). The cathode consisted of 20 nm of calcium and 100 nm of aluminum, which were thermally evaporated to the top of the photoactive layer with a shadow mask to define an active area of 0.04 cm<sup>2</sup>. The current-voltage curves were measured under 100 mW/cm<sup>2</sup> standard AM 1.5 G spectrum using a solar simulator (XES-70S1, San-Ei Electric Co. Ltd., Osaka, Japan); AAA grade, 70 × 70 mm<sup>2</sup> photo-beam size), for which a 2 × 2 cm<sup>2</sup> monocrystalline silicon cell (SRC-1000-TC-Q; VLSI Standards Inc., Milpitas, CA, USA) was used for reference. All the electrical measurements were performed in a nitrogen-filled glove box at room temperature.

**Figure S1.** (a) *I-V* characteristics of SVA and CS<sub>2</sub>-casted P3HT/PC<sub>61</sub>BM devices under the illumination of AM 1.5G from a solar simulator (100 mW/cm<sup>2</sup>). (b) EQE curves of the corresponding polymer solar cells.

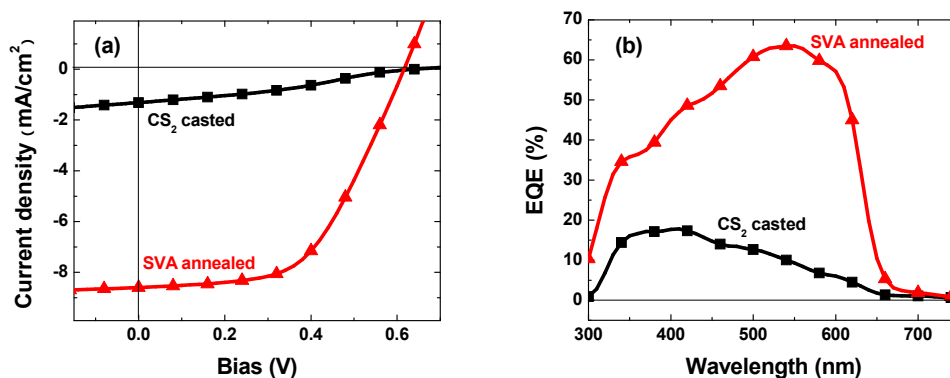

**Table S1.** Photovoltaic properties of SVA and CS<sub>2</sub>-casted P3HT/PC<sub>61</sub>BM devices.

| Devices                            | $V_{oc}$ (V) | $J_{sc}$ (mA/cm <sup>2</sup> ) | $FF$ (%) | PCE (%) |
|------------------------------------|--------------|--------------------------------|----------|---------|
| P3HT/PCBM (CS <sub>2</sub> casted) | 0.64         | 1.31                           | 31.9     | 0.27    |
| P3HT/PCBM (SVA annealed)           | 0.62         | 8.60                           | 54.1     | 2.86    |

## S2. Log-log Plots of Recombination Kinetics

**Figure S2.** Log-log plots of the kinetics probed at 1,000 nm under the indicated excitation wavelengths ( $\lambda_{\text{ex}}$ ) and photon fluences (in photons·cm<sup>-3</sup>·pulse<sup>-1</sup>) for the SVA blend film of P3HT/PC<sub>61</sub>BM (1:1, w/w). Solid lines are the best fits to the power law,  $\Delta\text{OD}(t) = A \cdot t^{-\alpha}$ . Vertical dashed lines indicate the occurrence of the delay time of  $\Delta t = 70$  ps. (cf Figure 2a of the main text.)

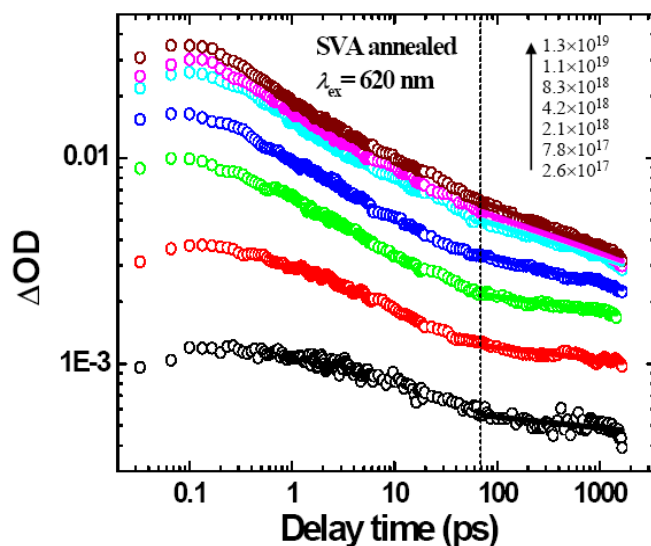

## S3. Power-law Exponent Plot Against Hole Concentration (the $\alpha$ -Plot)

**Figure S3.** Plot of power-law exponent ( $\Delta\text{OD}(t) = A \cdot t^{-\alpha}$ ) against the hole concentration at  $\Delta t = 1$  ns for the SVA and the CS<sub>2</sub>-casted blend P3HT/PC<sub>61</sub>BM films (1:1, w/w) under the excitation wavelengths of 620 nm or 460 nm. The hole concentration were calculated from the  $\Delta\text{OD}$  amplitudes at  $\Delta t = 1$  ns, for which the extinction coefficients of hole at 1,000 nm and of exciton at 1,200 nm were assumed to be the same [S1]. The solid and the dashed lines are for guiding the eyes.

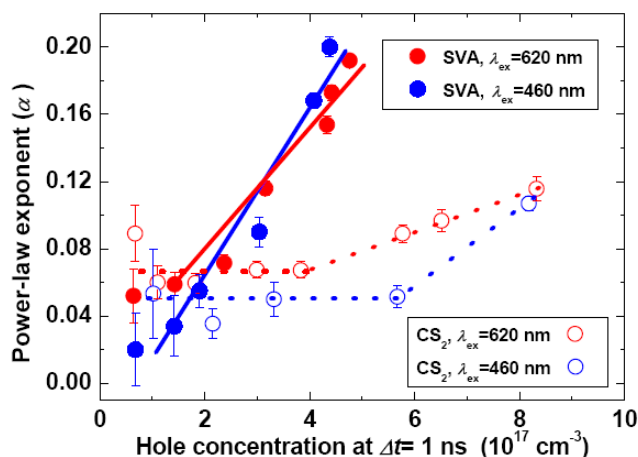

#### S4. Bimolecular Recombination Rate and Mobility of Hole

The rate equation of bimolecular charge recombination (CR) reaction can be written as [S2].

$$\frac{dn(t)}{dt} = -\gamma_{bi}(t) \cdot n(t)^2, \quad (S1)$$

where  $\gamma_{bi}$  stands for the bimolecular CR rate, and  $n(t)$  represents the hole concentration that follows the Beer-Lambert relation

$$n(t) = \Delta OD(t) \cdot N_A \cdot (1000 \cdot \varepsilon_h \cdot d)^{-1}, \quad (S2)$$

where  $N_A$  is Avogadro's constant, and  $d$  and  $\varepsilon_h$  denote the film thickness (190 nm) and the extinction coefficient of hole ( $\varepsilon_h = 3 \times 10^4 \text{ M}^{-1} \cdot \text{cm}^{-1}$ ) [S3], respectively. Combine Equations (1) and (2), we have

$$\gamma_{bi}(t) = -\frac{d(\Delta OD(t))}{dt} \frac{d \cdot \varepsilon_p}{\Delta OD(t)^2} \frac{1000}{N_A}. \quad (S3)$$

Since the hole dynamics in 70~1500 ps obey the power law,  $\Delta OD(t) = A \cdot t^{-\alpha}$ , it follows that

$$\frac{d(\Delta OD(t))}{dt} = -\alpha \cdot t^{-1} \cdot \Delta OD(t) \quad (S4)$$

and

$$\gamma_{bi}(t) = \frac{1000 \cdot \alpha \cdot d \cdot \varepsilon_h}{\Delta OD(t) \cdot N_A \cdot t}. \quad (S5)$$

Following the Langevin hole-limited bimolecular CR model [S4], the hole mobility ( $\mu_h$ ) reads

$$\mu_h(t) = \varepsilon_0 \cdot \varepsilon \cdot \gamma_{bi}(t) / e, \quad (S6)$$

where  $\varepsilon_0$  and  $\varepsilon$ , respectively, are the vacuum permittivity and the dielectric constant of the P3HT/PC<sub>61</sub>BM blend, and  $e$  is the elementary charge.

### S5. Quantitative Analyses of Bimolecular CR Rate and Hole Mobility

**Figure S4.** (a, b) Temporal evolution profiles of bimolecular CR rate ( $\gamma_{bi}$ ) for the SVA blend P3HT/PC<sub>61</sub>BM films (1:1, w/w) under photoexcitation at 620 nm or 460 nm. The initial hole concentration at  $\Delta t = 70$  ps are indicated in each panel. (c, d) Change of  $\gamma_{bi}$  upon varying the hole concentration at  $\Delta t = 70$  ps or 1 ns. The excitation wavelengths ( $\lambda_{ex}$ ) are indicated in each panel. Solid lines are for guiding the eyes.

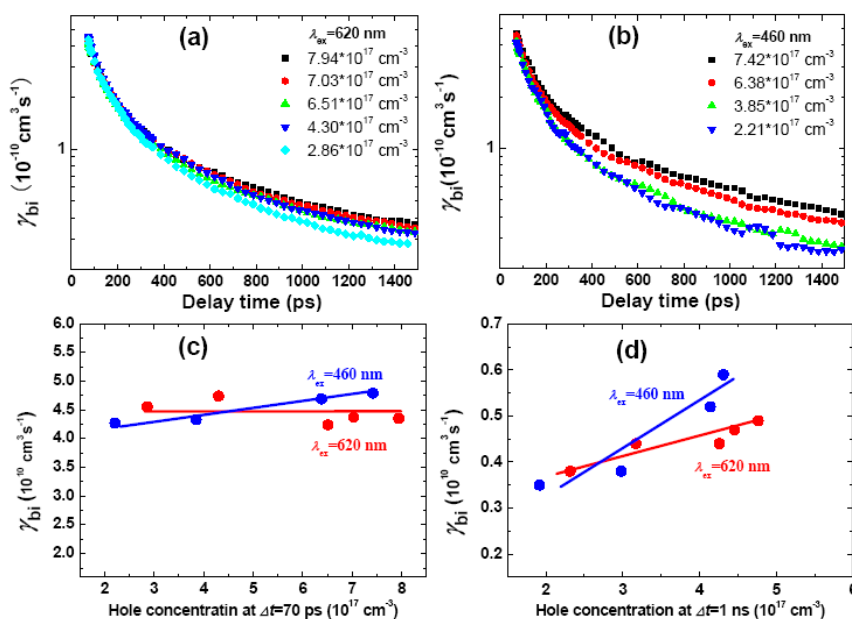

**Figure S5.** Temporal evolution profiles of bimolecular CR rate ( $\gamma_{bi}$ ) and hole mobility ( $\mu_h$ ) for the CS<sub>2</sub>-casted blend P3HT/PC<sub>61</sub>BM films (1:1, w/w) under photoexcitation at 620 nm or 460 nm. The initial hole concentration at  $\Delta t = 70$  ps are indicated in each panel.

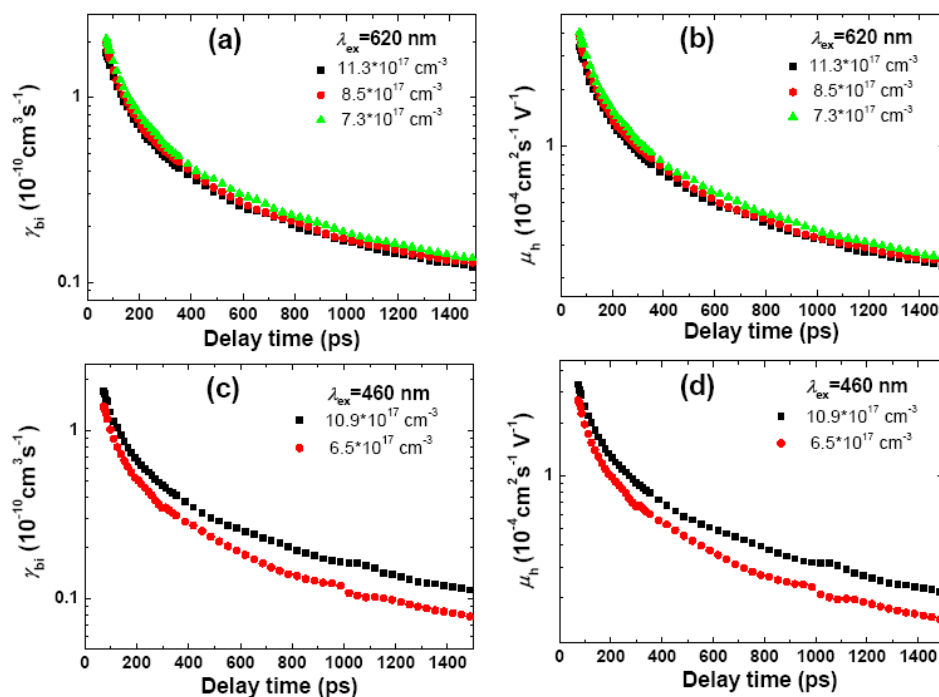

## S6. Comparison of Hole mobility to literature values determined with various methods

**Table S2** Hole mobility ( $\mu_h$ ) in neat P3HT or blend P3HT/PC<sub>61</sub>BM films determined by the use of various experimental methods: FET, field effect transistor; TOF, time of flight; CELIV, carrier extraction by linear increase voltage; TRMC, time-resolved microwave conductivity; SCLC, space charge limited current; TA, transient absorption.

| Method     | Temporal range          | $\mu_h$ (cm <sup>2</sup> ·V <sup>-1</sup> ·s <sup>-1</sup> ) | Sample                         | Reference   |
|------------|-------------------------|--------------------------------------------------------------|--------------------------------|-------------|
| FET        | steady state            | $1.7 \times 10^{-6}$ – $9.4 \times 10^{-3}$ (a)              | neat p3ht                      | [S5]        |
|            |                         | $5 \times 10^{-2}$ (TiO <sub>2</sub> based)                  | neat p3ht                      | [S6]        |
|            |                         | $1.8 \times 10^{-1}$ (SiO <sub>2</sub> based)                | neat p3ht                      | [S6]        |
|            |                         | $1 \times 10^{-2}$                                           | neat p3ht                      | [S7]        |
| TOF        | 1 $\mu$ s–1 ms          | $5.1 \times 10^{-5}$                                         | S-p3ht/PC <sub>61</sub> BM (b) | [S8]        |
|            | 0.1 $\mu$ s–100 $\mu$ s | $\sim 10^{-4}$                                               | T-p3ht/PC <sub>61</sub> BM (b) | [S9]        |
|            | 0.1 $\mu$ s–100 $\mu$ s | $1 \times 10^{-4}$                                           | neat p3ht                      | [S10]       |
| CELIV      | 1 $\mu$ s–600 $\mu$ s   | $10^{-6}$ – $10^{-5}$ (0.1–10 ms)                            | RRa-p3ht                       | [S11]       |
| TRMC       | 10 ns–450 ns            | $1.4 \times 10^{-2}$                                         | p3ht/PC <sub>61</sub> BM       | [S12]       |
|            |                         | $5.6 \times 10^{-3}$ (before)                                | p3ht/PC <sub>61</sub> BM       | [S13]       |
|            |                         | $4.4 \times 10^{-2}$ (after)                                 | T-p3ht/PC <sub>61</sub> BM (b) | [S13]       |
| SCLC       | steady state            | $2 \times 10^{-8}$                                           | T-p3ht/PC <sub>61</sub> BM (b) | [S14]       |
| $\mu$ s-TA | 1 $\mu$ s–1 ms          | $10^{-7}$ – $10^{-6}$                                        | p3ht/PC <sub>61</sub> BM       | [S2]        |
| fs-TA      | 70 ps–1.5 ns            | $8.7 \times 10^{-4}$ ( $\Delta t = 70$ ps)                   | S-p3ht/PC <sub>61</sub> BM (b) | [this work] |
|            |                         | $8.7 \times 10^{-5}$ ( $\Delta t = 1$ ns)                    | S-p3ht/PC <sub>61</sub> BM (b) | [this work] |

<sup>a</sup> Mobility increased from  $1.7 \times 10^{-6}$  to  $9.4 \times 10^{-4}$  cm<sup>2</sup>·V<sup>-1</sup>·s<sup>-1</sup> on increasing the molecular weight from 3.2 KD to 36.5 kD; <sup>b</sup> “S” denotes “slow growing” or “solvent annealing” and “T” represents “thermal annealing”.

## References

- S1. Guo, J.; Ohkita, H.; Bente, H.; Ito, S. Near-IR femtosecond transient absorption spectroscopy of ultrafast polaron and triplet exciton formation in polythiophene films with different regioregularities. *J. Am. Chem. Soc.* **2009**, *131*, 16869–16880.
- S2. Shuttle, C.G.; O'Regan, B.; Ballantyne, A.M.; Nelson, J.; Bradley, D.D.C.; Durrant, J.R. Bimolecular recombination losses in polythiophene:fullerene solar cells. *Phys. Rev. B* **2008**, *78*, 113201.
- S3. Guo, J.; Ohkita, H.; Yokoya, S.; Bente, H.; Ito, S. Bimodal polarons and hole transport in poly(3-hexylthiophene): Fullerene blend films. *J. Am. Chem. Soc.* **2010**, *132*, 9631–9637.
- S4. Koster, L.J.A.; Mihaileti, V.D.; Blom, P.W.M. Bimolecular recombination in polymer/fullerene bulk heterojunction solar cells. *Appl. Phys. Lett.* **2006**, *88*, 052104.
- S5. Kline, R.J.; McGehee, M.D. Controlling the field-effect mobility of regioregular polythiophene by changing the molecular weight. *Adv. Mater.* **2003**, *15*, 1519–1522.
- S5. Li, Z.Q.; Wang, G.M.; Sai, N.; Moses, D.; Martin, M.C.; Di Ventra, M.; Heeger, A.J.; Basov, D.N. Infrared imaging of the nanometer-thick accumulation layer in organic field-effect transistors. *Nano Lett.* **2006**, *6*, 224–228.

- S7. Bürgi, L.; Sirringhaus, H.; Friend, R.H. Noncontact potentiometry of polymer field-effect transistors. *Appl. Phys. Lett.* **2002**, *80*, 2913–2915.
- S8. Li, G.; Shrotriya, V.; Huang, J.; Yao, Y.; Moriarty, T.; Emery, K.; Yang, Y. High-efficiency solution processable polymer photovoltaic cells by self-organization of polymer blends. *Nat. Mater.* **2005**, *4*, 864–868.
- S9. Kim, Y.; Cook, S.; Tuladhar, S.M.; Choulis, S.A.; Nelson, J.; Durrant, J.R.; Bradley, D.D.C.; Giles, M.; McCulloch, I.; Ha, C.; *et al.* A strong regioregularity effect in self-organizing conjugated polymer films and high-efficiency polythiophene:fullerene solar cells. *Nat. Mater.* **2006**, *5*, 197–203.
- S10. Kim, Y.; Cook, S.; Choulis, S.A.; Nelson, J.; Durrant, J.R.; Bradley, D.D.C. Organic photovoltaic devices based on blends of regioregular poly(3-hexylthiophene) and poly(9,9-dioctylfluorene-co-benzothiadiazole). *Chem. Mater.* **2004**, *16*, 4812–4818.
- S11. Genevičius, K.; Österbacka, R.; Juška, G.; Arlauskas, K.; Stubb, H. Separation of fast and slow transport in regiorandom poly(3-hexylthiophene). *Synth. Met.* **2003**, *137*, 1407–1408.
- S12. Dicker, G.; de Haas, M.P.; Siebbeles, L.D.A.; Warman, J.M. Electrodeless time-resolved microwave conductivity study of charge-carrier photogeneration in regioregular poly(3-hexylthiophene) thin films. *Phys. Rev. B* **2004**, *70*, 045203.
- S13. Savenije, T.J.; Kroeze, J.E.; Yang, X.; Loos, J. The formation of crystalline P3HT fibrils upon annealing of a PCBM:P3HT bulk heterojunction. *Thin Solid Films* **2006**, *511*, 2–6.
- S14. Mihailetchi, V.D.; Xie, H.; de Boer, B.; Koster, L.J.A.; Blom, P.W.M. Charge transport and photocurrent generation in poly(3-hexylthiophene): Methanofullerene bulk-heterojunction solar cells. *Adv. Funct. Mater.* **2006**, *16*, 699–708.
